# Supplementary material for: Gametic cycle and gonadal maturity of Bulimulus bonariensis (Rafinesque, 1833) (Gastropoda: Bulimulidae), in a rural area of Buenos Aires, Argentina
Source: PeerJ. 2023 Apr 18;11:e15221. doi: 10.7717/peerj.15221 (PMC10120589; doi:10.7717/peerj.15221)
Supplement: Supplemental Information 1 [file peerj-11-15221-s001.xlsx]

## Sheet: Hoja1
Summer 2018	Sampling	total length (mm)	length of the penile complex (mm)	spermioviduct	gonadal stage	ovotestis
	14.iii.2018	10.28	4.0	undeveloped	1	0
		11.62	1.63	undeveloped	1	0
	25.iii.2018	26.73	9.5	developed	3	1
		16.2	6.63	in the process of development	3	1
		6.5	0.74	undeveloped	1	0
		7.0	0.84	undeveloped	1	0
		7.2	0.88	undeveloped	1	0
		8.46	0.95	undeveloped	1	0
		10.12	2.12	undeveloped	1	0
		9.68	2.0	undeveloped	1	0
		9.36	1.95	undeveloped	1	0
		9.87	1.99	undeveloped	1	0
		8.78	0.98	undeveloped	1	0
		8.38	0.93	undeveloped	1	0
		11.3	1.4	in the process of development	2	1
		12.1	1.73	in the process of development	2	1
		12.6	2.0	in the process of development	3	1
		17.56	4.0	developed	3	1
		18.3	4.5	developed	4	1
		19.65	7.2	developed	4	1
		20.2	7.3	developed	4	1
Autumn 2018	8.iv.2018	11.84	1.5	undeveloped	1	0
		7.87	0.875	undeveloped	1	0
		12.87	1.63	undeveloped	1	1
		15.72	3.25	undeveloped	2	1
		14.09	2.25	undeveloped	1	1
		8.88	1.0	undeveloped	1	0
		23.62	9.88	developed	5	1
		23.78	9.88	developed	5	1
		23.73	9.88	undeveloped	2	1
	19.vii.2018	24.99	6.88	developed	5	1
		11.84	2.75	undeveloped	1	0
		14.94	3.13	undeveloped	1	1
		11.37	3.0	undeveloped	1	0
		12.57	3.25	undeveloped	1	0
		13.74	3.25	undeveloped	1	1
		9.91	1.63	undeveloped	1	0
		12.88	3.63	undeveloped	1	1
		18.2	4.5	undeveloped	2	1
		13.49	6.0	undeveloped	1	1
		12.87	3.38	undeveloped	1	1
		15.54	4.88	undeveloped	1	1
		13.86	5.25	undeveloped	1	1
		8.55	1.5	undeveloped	1	0
		11.45	2.75	undeveloped	1	0
		17.26	4.38	undeveloped	2	1
Winter 2018	2.ix.2018	15.86	5.75	undeveloped	1	1
		14.34	2.75	undeveloped	1	1
		11.96	3.38	undeveloped	1	1
		17.34	6.25	in the process of development	3	1
		14.98	5.63	undeveloped	1	1
		10.77	2.38	undeveloped	1	0
		18.38	10.38	developed	3	1
		10.18	2.75	undeveloped	1	0
		12.12	4.13	undeveloped	1	0
		13.54	4.5	undeveloped	2	1
		12.29	3.63	undeveloped	1	1
		13.13	5.63	undeveloped	1	1
		13.33	5.88	undeveloped	1	1
		26.62	9.38	developed	4	1
Spring 2018	11.xii.2018	22.5	7.75	developed	4	1
		15.0	6.63	undeveloped	2	1
		29.51	10.63	developed	4	1
	20.xii.2018	19.11	8.38	in the process of development	3	1
		13.96	7.13	developed	3	1
		24.69	10.38	developed	4	1
		19.46	7.88	developed	4	1
		23.15	11.25	developed	4	1
		20.13	7.5	developed	4	1
		20.41	8.0	developed	4	1
		16.55	6.5	developed	3	1
		22.78	9.13	developed	4	1
		19.04	9.63	developed	3	1
		21.27	7.13	developed	4	1
		26.61	7.88	developed	4	1
		16.52	8.13	developed	3	1
		21.22	8.75	developed	4	1
		22.39	8.38	developed	4	1
		15.98	7.75	in the process of development	3	1
		22.73	6.5	developed	4	1
		19.37	8.25	in the process of development	3	1
		19.83	9.75	in the process of development	3	1
		18.94	8.0	in the process of development	3	1
		19.37	9.38	developed	3	1
		18.2	9.13	developed	3	1
		22.66	6.88	developed	4	1
		20.0	6.0	developed	4	1
		21.93	8.13	developed	4	1
Summer 2019	12.iii.2019	17.29	3.38	in the process of development	3	1
		22.22	7.75	developed	4	1
		14.53	3.5	undeveloped	2	1
		14.13	2.88	undeveloped	2	1
		12.97	2.0	undeveloped	2	1
		12.79	2.13	undeveloped	2	1
		11.27	1.63	undeveloped	1	0
		14.56	4.0	undeveloped	2	1
		9.36	1.5	undeveloped	1	0
		11.6	1.25	undeveloped	1	0
		8.56	0.63	undeveloped	1	0
		11.79	1.5	undeveloped	1	0
		7.22	0.88	undeveloped	1	0
		10.48	0.88	undeveloped	1	0
		7.92	1.25	undeveloped	1	0
		14.22	2.13	undeveloped	2	1
		8.03	0.88	undeveloped	1	0
		6.98	0.75	undeveloped	1	0
		7.05	0.74	undeveloped	1	0
		7.12	0.8	undeveloped	1	0
		12.03	1.5	undeveloped	2	1
		12.35	1.8	undeveloped	2	1
		12.63	4.5	developed	3	1
		12.7	4.63	developed	4	1
Autumn 2019	10.v.2019	15.31	3.38	undeveloped	2	1
		14.63	3.25	undeveloped	2	1
		12.37	3.25	undeveloped	1	1
		17.92	5.25	undeveloped	2	1
		12.32	2.25	undeveloped	1	0
		11.81	3.	undeveloped	1	1
		12.17	1.63	undeveloped	1	0
		9.26	3.0	undeveloped	1	0
		12.4	3.25	undeveloped	1	0
		13.2	3.13	undeveloped	2	1
		12.66	2.25	undeveloped	1	0
		11.03	2.25	undeveloped	1	0
		14.7	3.25	undeveloped	2	1
		14.63	4.13	undeveloped	2	1
		13.33	2.88	undeveloped	2	1
		10.55	2.63	undeveloped	1	0
		10.24	2.13	undeveloped	1	0
		11.04	2.75	undeveloped	1	0
		12.51	3.75	undeveloped	2	1
		12.94	4.0	undeveloped	2	1
		7.89	1.13	undeveloped	1	0
		9.94	2.13	undeveloped	1	0
		8.3	1.5	undeveloped	1	0
		10.26	2.25	undeveloped	1	0
		9.19	1.88	undeveloped	1	0
		7.71	1.0	undeveloped	1	0
Winter 2019	26.vii.2019	12.8	3.25	developed	3	1
		12.8	3.25	developed	4	1
		9.92	1.88	undeveloped	1	0
		12.02	2.5	in the process of development	3	0
		11.27	2.25	undeveloped	1	0
		10.03	0.88	undeveloped	1	0
		12.14	1.5	undeveloped	1	0
		12.72	3.13	undeveloped	1	1
		8.42	0.88	undeveloped	1	0
	12.ix.2019	12.97	3.63	undeveloped	2	1
		16.53	5.75	in the process of development	3	1
		16.03	5.5	developed	4	1
		11.59	3.38	developed	3	1
Spring 2019	1.x.2019	15.77	5.5	undeveloped	2	1
		23.48	8.5	developed	4	1
		28.11	7.63	developed	4	1
		11.52	4.0	undeveloped	1	0
	16.xi.2019	21.02	8.13	developed	4	1
		22.77	9.63	developed	4	1
		20.35	7.75	in the process of development	3	1
		10.62	5.63	undeveloped	1	0
		14.66	3.25	in the process of development	3	1
		21.99	7.5	developed	4	1
		10.65	5.75	undeveloped	1	0
		10.47	5.5	undeveloped	1	0
		15.62	5.0	in the process of development	3	1
		13.99	5.0	in the process of development	3	1
		15.61	5.38	in the process of development	3	1
		7.3	1.13	undeveloped	1	0
		11.21	5.88	undeveloped	2	1
					1.- Proliferation	0.- immature
					2.- Growth	1.- mature
					3.- Pre-evacuation
					4.- Evacuation
					5.- Resorption
