# Supplementary material for: Gametic cycle and gonadal maturity of Bulimulus bonariensis (Rafinesque, 1833) (Gastropoda: Bulimulidae), in a rural area of Buenos Aires, Argentina
Source: PeerJ. 2023 Apr 18;11:e15221. doi: 10.7717/peerj.15221 (PMC10120589; doi:10.7717/peerj.15221)
Supplement: Supplemental Information 2 [file peerj-11-15221-s002.xlsx]

## Sheet: Hoja1
Summer 2018	oocyte frequency (um)	10-20	20-40	40-60	60-80	80-100	100-120	120-140
			21.52	40.56	60.23	88.4
			35.69	59.81	70.98	85.23
			29.83	42.6	78.91	91.02
			39.17	53.91	64.56	96.16
				48.49	66.32	81.36
				56.32	69.11	84.54
				54.1	72.1	98.1
				53.22	63.23	82.61
				48.79	72.41	96.43
				44.23	70.02	80.36
					78.4
					70.45
					60.21
					66.38
					61.82
					76.84
					65.7
					69.14
					68.37
					74.63
					77.06
					74.31
					78.66
					65.12
					79.01
					78.98
	Total		4	10	26	10
Autumn 2018	oocyte frequency (um)	10-20	20-40	40-60	60-80	80-100	100-120	120-140
			21.1	41.58	65.29
			26.84	57.59	62.05
			23.21	42.18	71.45
			35.47	56.41	63.91
			38.4	42.3	70.21
			39.02	58.79	69.47
			26.8	51.06	63.22
			24.59	52.17	64.41
			23.17	55.1	78.4
			28.79	53.87	62.98
			37.71	40.18	74.8
			34.42	43.22	72.51
				42.69	63.45
				54.11	61.23
				50.2	74.4
				58.79	77.02
				53.64	75.51
				46.15	62.2
				49.1	76.6
				55.4	66.36
				57.23	64.8
				44.69	75.56
				44.87	63.35
				58.4	70.09
				51.26	70.24
				57.08
				54.62
				40.94
				47.65
				51.26
	Total		12	30	25
Winter 2018	oocyte frequency (um)	10-20	20-40	40-60	60-80	80-100	100-120	120-140
			20.36	41.56	64.05	92.16
			32.08	41.6	70.68	80.54
			22.84	56.45	62.05	82.45
			36.19	46.21	63.45	91.06
			26.6	48.08	63.12	93.17
			30.12	54.66	78.87	84.65
			38.19	48.11		87.09
				57.04		93.16
				43.24		87.45
				46.48		86.91
				54.84		80.03
				40.64		86.15
				48.2		96.18
				47.64		88.01
				43.13
				47.06
				57.22
				52.09
				51.04
				47.18
				46.12
				46.32
				50.3
	Total		7	23	6	14
Spring 2018	oocyte frequency (um)	10-20	20-40	40-60	60-80	80-100	100-120	120-140
			34.16	42.11	62.15	94.5	102.2
			22.05	54.26	71.1	93.13	111.15
			23.64	41.06	78.51	96.12	106.3
			39.56	55.31	61.08	84.5	116.4
			24.44	46.6	79.22	86.2	112.3
			38.9	56.41	61.05	97.48	104.1
			21.05	41.2	74.15	85.3	117.4
			31.06	59.05	68.15	84.15	110.03
			22.2	43.16	79.84	92.01	111.7
			34.8	59.8	62.05	98.4	103.15
			29.8	41.03	64.03	87.5	107.48
			34.74	51.07	68.59	83.23	106.1
			20.78	49.8	74.12	89.7	117.02
			26.84	51.2	76.13	92.4
				43.16	75.26	81.02
				53.62	71.26
				47.13	75.28
				47.14	62.15
				41.15	68.49
				55.01	64.45
				46.32	69.8
				40.36	71.25
				57.81	68.47
					79.48
					62.15
					63.04
					73.26
					64.05
					63.02
					79.1
					76.32
					74.02
	Total		14	23	32	15	13
Summer 2019	oocyte frequency (um)	10-20	20-40	40-60	60-80	80-100	100-120	120-140
			32.2	41.1	65.4
			20.16	43.62	63.23
			27.84	47.32	71.16
			36.5	58.74	73.2
			21.88	48.9	78.25
			36.45	51.06	60.27
			27.11	54.2	63.55
			36.48	56.13	63.3
			32.7	57.17
			27.98
			34.55
			36.4
			28.44
			26.4
			34.8
			36.2
			20.63
			23.31
			27.8
			26.1
			38.9
			30.7
			26.23
	Total		23	9	8
Autumn 2018	oocyte frequency (um)	10-20	20-40	40-60	60-80	80-100	100-120	120-140
			23.3	41.15	65.7
			27.7	45.7	72.15
			26.5	49.58	76.03
			32.1	56.6	74.6
			38.4	58.7	63.26
			26.4	46.3	68.4
			26.56	51.2	72.05
			29.9	48.95	78.94
				52.10	61.03
				46.39	74.1
				48.74	79.8
				46.32	63.2
				52.02	61.05
				56.31	64.18
				46.98	62.03
				56.87	77.01
				41.74
				54.74
				41.12
				46.35
				51.02
				54.32
				46.21
				48.47
				58.21
				46.35
				54.12
				43.03
				41.02
				46.09
				54.82
				56.31
				46.87
				42.05
				49.65
				47.84
				57.4
				52.1
	Total		8	38	16	0
Winter 2019	oocyte frequency (um)	10-20	20-40	40-60	60-80	80-100	100-120	120-140
			23.21	41.54	62.2	84.4
			25.4	52.2	74.8	92.16
			26.8	41.65	66.3	94.4
			21.02	59.74	70.25	93.12
			35.16	58.4	73.13	88.05
			38.7	47.74	74.14	83.6
				41.03	65.1	99.4
				52.06	62.33	97.8
				43.1	76.9	84.3
				59.2		80.22
				56.3		97.29
				48.74		98.01
				41.84		82.2
				42.15
				54.8
				46.9
	Total		6	16	9	13
Spring 2019	oocyte frequency (um)	10-20	20-40	40-60	60-80	80-100	100-120	120-140
			22.23	41.84	63.54	91.13	103.36	122.37
			34.74	42.65	69.8	96.45	117.2	139.58
			25.54	46.9	74.1	84.12	105.64	126.34
			31.12	58.16	74.6	87.44	118.01	125.06
			36.8	54.23	76.32	99.0	102.8	132.41
			24.2	58.7	75.26	93.2	113.29	130.02
				41.8	78.12	80.21	118.74	130.67
					69.1	86.24	104.52	128.36
					63.54	99.02	112.2	120.36
					71.1	87.17	105.06	131.1
					68.23	88.16	114.8
					79.62	91.54	117.7
					74.8	95.2
					66.03	96.23
					63.14	98.14
					72.16	98.0
					74.19	83.36
					68.49
					62.16
					63.23
					78.49
					62.22
					69.04
	Total		6	7	23	17	12	10
